# Supplementary material
Source: MDPI journal article supplement (https://www.mdpi.com/2311-7524/9/11/1236)
Supplement: s1 [file s1]

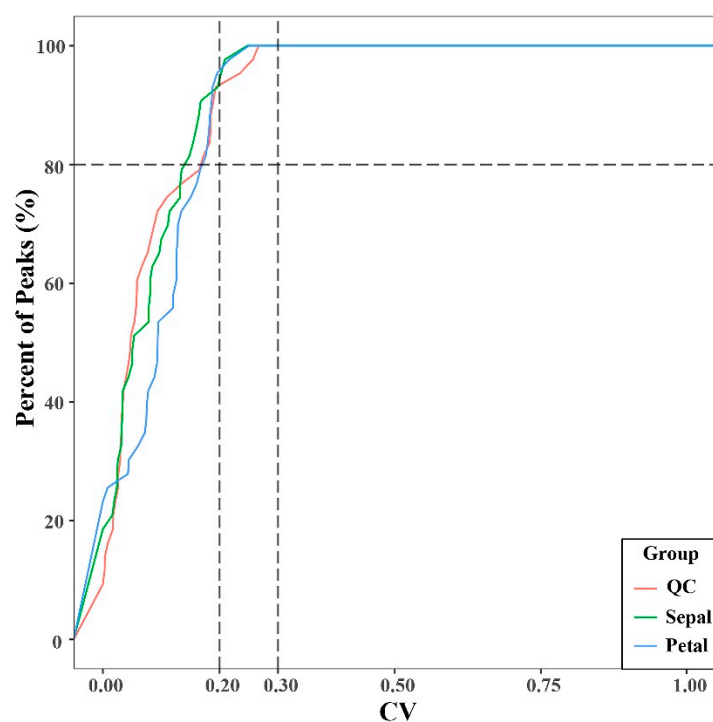

Figure S1. Distribution of the coefficient of variation values from different samples. The QC sample represented a mixture of sepals and petals.

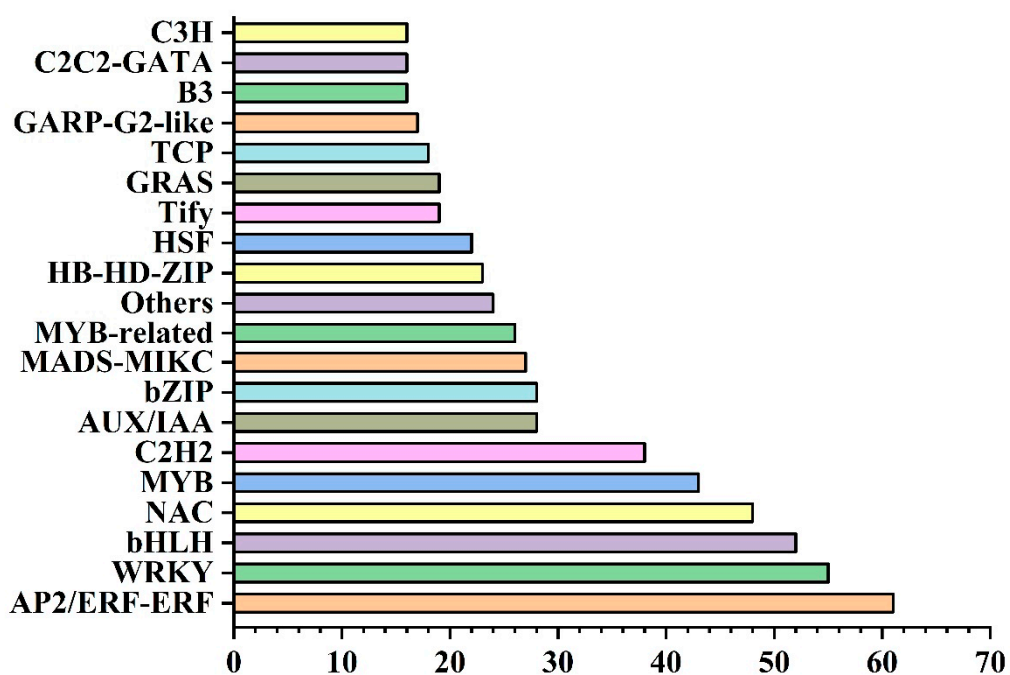

Figure S2. Differentially expressed transcription factors between sepals and petals in *F. hybrida*
