# Supplementary material
Source: MDPI journal article supplement (https://www.mdpi.com/2311-7524/9/11/1236)
Supplement: s1 [file s1 › Supplemental tables.xlsx]

## Sheet: Table S1
	Table S1. The regression equations used for semiquantitative interpretation
	Standards	Brand	Equation	R2
	Cyanidin-3,5-O-diglucoside	ExtraSynthese	y = 71618.7 x + 1593.3	0.99977
	Cyanidin-3-O-galactoside	ExtraSynthese	y = 75466.4 x + 83447.1	0.99675
	Cyanidin-3-O-glucoside	ExtraSynthese	y = 126154.0 x + 26933.7	0.99918
	Cyanidin-3-O-sambubioside	ExtraSynthese	y = 121115.0 x + 10866.7	0.99879
	Cyanidin-3-O-arabinoside	ExtraSynthese	y = 160564.0 x + 38709.6	0.99833
	Delphinidin-3,5-O-diglucoside	Zzstandard	y = 40529.7 x - 10917.3	0.99995
	Delphinidin-3-O-rutinoside	ExtraSynthese	y = 62313.9 x - 12801.8	0.99964
	Delphinidin-3-O-rhamnoside	ExtraSynthese	y = 67123.9 x + 9562.3	0.99881
	Quercetin-3-O-glucoside	BioBioPha	y = 8334.7 x + 93238.2	0.99629
	Naringenin	ExtraSynthese	y = 37542.8 x + 7185.4	0.9986
	Malvidin-3,5-O-diglucoside	Desite	y = 2285.1 x - 35649.2	0.99808
	Malvidin-3-O-glucoside	Zzstandard	y = 128261.0 x + 18401.1	0.99928
	Malvidin-3-O-arabinoside	Zzstandard	y = 67398.8 x + 13708.8	0.99893
	Pelargonidin-3,5-O-diglucoside	ExtraSynthese	y = 52051.3 x + 37819.8	0.99998
	Pelargonidin-3-O-glucoside	Zzstandard	y = 134196.0 x + 16010.4	0.9988
	Peonidin-3,5-O-diglucoside	ExtraSynthese	y = 2265.3 x - 27676.9	0.99866
	Peonidin-3-O-glucoside	Zzstandard	y = 217514.0 x + 95759.1	0.9968
	Peonidin-3-O-arabinoside	ExtraSynthese	y = 126202.0 x + 45579.5	0.99828
	Petunidin-3-O-glucoside	Zzstandard	y = 121398.0 x + 43382.7	0.99419
	Procyanidin B1	Zzstandard	y = 4906.7 x - 51.7	0.99989
	Procyanidin B4	Zzstandard	y = 4812.3 x - 604.9	0.99991
	Procyanidin B2	Desite	y = 4301.0 x + 1406.2	0.99995
	Procyanidin A2	ExtraSynthese	y = 8780.9 x - 2653.1	0.99718

## Sheet: Table S2
	Table S2. The primer information used in qRT-PCR verification
	Unigene	Primer sequence
	Cluster-23501.0-F	GAACGACGCCCTCCAGCAT
	Cluster-23501.0-R	TTCGCTTCAGGAGACACACCAT
	Cluster-24425.1-F	ACGATGACTTCTTTGTTGCTCTTCT
	Cluster-24425.1-R	TTACATTGACAGTTTTGGAAGTTGC
	Cluster-11688.9-F	GAGATTGCGGTTGCGGTGTT
	Cluster-11688.9-R	ATTGTACGCCAAGTGGATCGC
	Cluster-21830.1-F	GAGCCACCGTGCTTGACCCT
	Cluster-21830.1-R	GCTGCCGCCGATGATGTG
	Cluster-254.1-F	GAGCCAAGGTGGTCTGCGTTAC
	Cluster-254.1-R	AGCCGCCTTACGCTTCCAG
	Cluster-24590.0-F	ATGCCGCTCCGCTCCTTT
	Cluster-24590.0-R	AAAGCGTCGGTCAACAAGCAG
	Cluster-24590.2-F	CTGAGAAAGAACCCAACACCCC
	Cluster-24590.2-R	GGGCGGTGTTGAAGAAGGA
	Cluster-2682.0-F	GGAAGTACAGTGTCTGGATCGGAG
	Cluster-2682.0-R	GACTCATCGTACTCACCCTTGGA

## Sheet: Table S3
	Table S3. Metabolites detected by UPLC-MS/MS in F. hybrida sepals and petals
	Index	Compounds	Class	Q1 (Da)	Q3 (Da)	Molecular Weight	Ion mode	Ionization model
	Anthocyanidin_04	Cyanidin-3,5-O-diglucoside	Cyanidin	611.2	287.1	611.161	Positive	[M]+
	Anthocyanidin_10	Cyanidin-3-O-galactoside	Cyanidin	449.1	287.1	449.108	Positive	[M]+
	Anthocyanidin_11	Cyanidin-3-O-glucoside	Cyanidin	449.1	287.1	449.108	Positive	[M]+
	Anthocyanidin_08	Cyanidin-3-O-arabinoside	Cyanidin	419.1	287.1	419.098	Positive	[M]+
	Anthocyanidin_14	Cyanidin-3-O-sambubioside	Cyanidin	581.1	287.1	581.151	Positive	[M]+
	Anthocyanidin_209	Delphinidin-5-O-rhamnoside	Delphinidin	449.11	303.1	449.108	Positive	[M+H]+
	Anthocyanidin_29	Delphinidin-3-O-rutinoside	Delphinidin	611.1	303.1	611.161	Positive	[M]+
	Anthocyanidin_28	Delphinidin-3-O-rhamnoside	Delphinidin	449.1	303.1	449.108	Positive	[M]+
	Anthocyanidin_230	Delphinidin-3-O-(coumaroyl)glucoside-5-O-galactoside	Delphinidin	773.22	303.1	773.193	Positive	[M+H]+
	Anthocyanidin_19	Delphinidin-3,5-O-diglucoside	Delphinidin	627	303.1	627.156	Positive	[M]+
	Anthocyanidin_227	Delphinidin-glucoside-feruloyl-xyloside	Delphinidin	773.18	303.05	773.214	Positive	[M+H]+
	Anthocyanidin_213	Delphinidin-3-O-(6''-O-tartaryl)glucoside	Delphinidin	597.14	303.1	597.109	Positive	[M+H]+
	Anthocyanidin_208	Delphinidin-3-O-xyloside	Delphinidin	435.09	303.1	435.093	Positive	[M+H]+
	Anthocyanidin_216	Delphinidin-3-O-(6''-O-caffeoyl)glucoside	Delphinidin	627.17	303.1	627.135	Positive	[M+H]+
	Anthocyanidin_49	Malvidin-3-O-arabinoside	Malvidin	463.3	331.06	463.124	Positive	[M]+
	Anthocyanidin_44	Malvidin-3,5-O-diglucoside	Malvidin	655.4	331.1	655.187	Positive	[M]+
	Anthocyanidin_51	Malvidin-3-O-glucoside	Malvidin	493.1	331.1	493.135	Positive	[M]+
	Anthocyanidin_278	Pelargonidin-3-O-rhamnoside-5-O-glucoside	Pelargonidin	579.15	271.1	579.171	Positive	[M+H]+
	Anthocyanidin_68	Pelargonidin-3-O-glucoside	Pelargonidin	433.2	271.1	433.113	Positive	[M]+
	Anthocyanidin_59	Pelargonidin-3,5-O-diglucoside	Pelargonidin	595.1	271.1	595.166	Positive	[M]+
	Anthocyanidin_409	Peonidin-3-O-(acetyl)(malonyl)galactoside	Peonidin	591.1	301.1	591.135	Positive	[M+H]+
	Anthocyanidin_334	Peonidin-3-O-sophoroside-5-O-glucoside	Peonidin	787.21	301.1	787.23	Positive	[M+H]+
	Anthocyanidin_77	Peonidin-3-sophoroside-5-glucoside	Peonidin	787.23	301.1	787.23	Positive	[M]+
	Anthocyanidin_78	Peonidin-3,5-O-diglucoside	Peonidin	625.2	301.1	625.177	Positive	[M]+
	Anthocyanidin_82	Peonidin-3-O-arabinoside	Peonidin	433.2	301.1	433.113	Positive	[M]+
	Anthocyanidin_75	Peonidin	Peonidin	301.1	245.3	301.071	Positive	[M]+
	Anthocyanidin_86	Peonidin-3-O-glucoside	Peonidin	463.3	301.1	463.124	Positive	[M]+
	Anthocyanidin_324	Peonidin-3-O-araboside-glucoside	Peonidin	595.17	301.1	595.166	Positive	[M+H]+
	Anthocyanidin_319	Peonidin-3-O-xyloside	Peonidin	433.11	301.1	433.113	Positive	[M+H]+
	Anthocyanidin_88	Peonidin-3-O-rutinoside	Peonidin	609.5	301.1	609.182	Positive	[M]+
	Anthocyanidin_98	Petunidin-3-O-glucoside	Petunidin	479.1	317.1	479.119	Positive	[M]+
	Anthocyanidin_96	Petunidin-3-O-arabinoside	Petunidin	449.1	317.06	449.108	Positive	[M]+
	Anthocyanidin_100	Petunidin-3-O-sambubioside	Petunidin	611.15	317.1	611.161	Positive	[M]+
	Anthocyanidin_369	Petunidin-glucoside-galactoside	Petunidin	641.17	317.1	641.172	Positive	[M+H]+
	Anthocyanidin_368	Petunidin-3-O-(6''-O-caffeoyl)-galactoside	Petunidin	641.15	317.1	641.151	Positive	[M+H]+
	Anthocyanidin_367	Petunidin-3-O-(6''-O-caffeoyl)-rhamnoside	Petunidin	625.16	317.1	625.156	Positive	[M+H]+
	Anthocyanidin_97	Petunidin-3-O-galactoside	Petunidin	479.1	317.1	479.119	Positive	[M]+
	Anthocyanidin_109	Procyanidin B4	Procyanidin	579.1	291.1	578.142	Positive	[M+H]+
	Anthocyanidin_106	Procyanidin B2	Procyanidin	579.1	427.1	578.142	Positive	[M+H]+
	Anthocyanidin_104	Procyanidin A2	Procyanidin	577.3	425.1	576.127	Positive	[M+H]+
	Anthocyanidin_105	Procyanidin B1	Procyanidin	579.1	427.1	578.142	Positive	[M+H]+
	Anthocyanidin_39	Naringenin	flavonoid	273	153.1	272.068	Positive	[M+H]+
	Anthocyanidin_41	Quercetin-3-O-glucoside	flavonoid	465.1	303.1	464.095	Positive	[M+H]+

## Sheet: Table S4
	Table S4. Summary of sequencing and assembly quality in RNA-Seq
	Transcriptome quality	Summary	Statistics
	Sequencing	Total clean data (Gb)	48.35
		Q30 percentage(%)	94.07
		GC percentage(%)	49.34
	Assembly quality of transcripts	Total number	141264
		200-300 bp	21384
		300-400 bp	15105
		400-500 bp	9683
		500-600 bp	7583
		600-700 bp	7079
		700-800 bp	6685
		800-900 bp	6196
		900-1000 bp	5934
		1000-1100 bp	5685
		1100-1200 bp	5277
		1200-1300 bp	4899
		1300-1400 bp	4516
		1400-1500 bp	4125
		1500-1600 bp	3960
		1600-1700 bp	3721
		1700-1800 bp	3174
		1800-1900 bp	2997
		1900-2000 bp	2693
		＞2000 bp	20568
		Mean length(bp)	1119
		N50	1649
	Assembly quality of unigenes	Total number	70135
		200-300 bp	1525
		300-400 bp	4468
		400-500 bp	5397
		500-600 bp	5037
		600-700 bp	4474
		700-800 bp	4046
		800-900 bp	3606
		900-1000 bp	3378
		1000-1100 bp	3168
		1100-1200 bp	3012
		1200-1300 bp	2801
		1300-1400 bp	2690
		1400-1500 bp	2456
		1500-1600 bp	2269
		1600-1700 bp	2285
		1700-1800 bp	1996
		1800-1900 bp	1868
		1900-2000 bp	1669
		＞2000 bp	13990
		Mean length(bp)	1362
		N50	1804

## Sheet: Table S5
	Table S5. DEGs involved in anthocyanin biosynthesis in F. hybrida sepals and petals
	Unigene	Assembled length	Rename	Blast Result	FPKM
					Sepal	Petal
	Cluster-12111.0	399	FhPAL1	phenylalanine ammonia-lyase	12.26±3.13	68.12±3.83
	Cluster-12111.1	282	FhPAL2	phenylalanine ammonia-lyase	2.67±1.0	31.13±5.24
	Cluster-12111.15	219	FhPAL3	phenylalanine ammonia-lyase-like	2.50±1.10	33.66±6.18
	Cluster-12111.2	537	FhPAL4	phenylalanine ammonia-lyase	5.49±1.42	53.24±4.51
	Cluster-12111.3	282	FhPAL5	phenylalanine ammonia-lyase	9.96±1.35	75.40±9.83
	Cluster-12111.5	264	FhPAL6	phenylalanine ammonia-lyase-like	5.96±0.66	41.20±7.50
	Cluster-10059.0	1650	Fh4CL1	4-coumarate--CoA ligase-like	0.54±0.27	2.93±0.78
	Cluster-11894.0	1629	Fh4CL2	4-coumarate--CoA ligase-like	49.15±1.37	19.42±0.87
	Cluster-16343.2	1632	Fh4CL3	4-coumarate--CoA ligase-like	1.49±0.16	4.78±0.17
	Cluster-20890.0	1614	Fh4CL4	4-coumarate--CoA ligase-like	9.94±0.42	2.09±0.24
	Cluster-30733.3	1575	Fh4CL5	4-coumarate--CoA ligase 1-like	1.31±0.46	2.52±0.34
	Cluster-30733.4	1624	Fh4CL6	4-coumarate--CoA ligase 1-like	16.45±1.23	35.06±1.14
	Cluster-23501.0	723	FhCHI1	chalcone isomerase	548.53±6.87	1353.89±22.47
	Cluster-24425.0	717	FhCHI2	chalcone isomerase	412.69±6.94	991.93±28.95
	Cluster-24425.1	702	FhCHI3	probable chalcone--flavonone isomerase	676.41±7.42	1562.71±10.04
	Cluster-28928.4	900	FhCHI4	chalcone-flavanone isomerase family protein, putative isoform	0.48±0.68	4.19±1.79
	Cluster-27803.2	1008	FhF3H1	flavanone 3-hydroxylase isoform	49.98±1.03	5.44±0.27
	Cluster-8493.13	204	FhF3H2	flavanone 3-hydroxylase-like	0.66±0.49	45.4±0.75
	Cluster-8493.3	462	FhF3H3	flavanone 3-hydroxylase	0.07±0.06	24.84±2.23
	Cluster-18576.0	1377	FhF3'H	flavonoid 3'-monooxygenase	22.82±1.09	4.18±0.25
	Cluster-11688.9	500	FhF3'5'H	flavonoid 3',5'-hydroxylase	0.38±0.10	134.62±8.24
	Cluster-21830.1	903	FhDFR	dihydroflavonol-4-reductase	2.09±0.17	0.68±0.16
	Cluster-254.1	1020	FhANR	anthocyanidin reductase	16.22±3.97	0.00±0.00
	Cluster-23602.1	762	FhGT1	anthocyanidin 5,3-O-glucosyltransferase	4.61±0.81	23.94±0.33
	Cluster-23602.2	1068	FhGT2	anthocyanidin 5,3-O-glucosyltransferase	37.10±0.86	220.45±4.31
	Cluster-24590.0	1389	FhGT3	UDP-glucose:flavonoid 3-O-glucosyltransferase	94.08±2.08	192.92±5.40
	Cluster-24590.2	201	FhGT4	UDP-glucose:flavonoid 3-O-glucosyltransferase	302.91±63.83	640.88±54.40
	Cluster-26954.0	1350	FhGT5	anthocyanidin 3-O-glucosyltransferase	386.77±8.29	101.06±2.39
	Cluster-1781.0	1353	FhGT6	anthocyanidin 3-O-glucosyltransferase	1.67±0.43	0.12±0.14
	Cluster-26623.0	1374	FhGT7	anthocyanidin 3-O-glucosyltransferase	7.19±0.46	2.5±0.70
	Cluster-26954.2	1356	FhGT8	anthocyanidin 3-O-glucosyltransferase	0.43±0.18	1.53±0.35
	Cluster-399.0	648	FhGT9	anthocyanidin 3-O-glucosyltransferase	9.27±1.02	0.00±0.00
	Cluster-23602.0	501	FhGT10	anthocyanidin 3,5-O-glucosyltransferase	1.54±0.69	6.86±0.68

## Sheet: Table S6
	Table S6. Annotation summary of proteins involved in the analyses of TFs interaction network
	Unigene	Rename	Similar protein in Arabidopsis	Identity	Bitscore	E-value
	Cluster-25982.3	FhMYB1	TT2	0.742	189.1	2e-48
	Cluster-6063.1	FhMYB2	TT2	0.697	184.9	5.2e-47
	Cluster-26633.0	FhMYB3	MYB90	0.676	195.7	3.5e-50
	Cluster-30543.0	FhMYB4	MYB12	0.692	231.5	3.7e-61
	Cluster-16199.1	FhMYB5	MYB7	0.848	256.5	1.7e-68
	Cluster-16987.0	FhMYB6	MYB7	0.636	247.3	1e-65
	Cluster-16987.1	FhMYB7	MYB7	0.617	249.6	2.1e-66
	Cluster-17504.10	FhMYB8	MYB7	0.557	285	4.4e-77
	Cluster-17504.9	FhMYB9	MYB7	0.681	275.4	2.5e-74
	Cluster-6611.1	FhMYB10	MYB7	0.807	156.8	1e-38
	Cluster-6611.2	FhMYB11	MYB7	0.766	144.1	8.8e-35
	Cluster-12767.0	FhWD40	TTG1	0.805	563.9	6.5e-161
